# Supplementary material for: Research in the Field of Exercise and Metabolomics: A Bibliometric and Visual Analysis
Source: MDPI journal article supplement (doi:10.3390/metabo12060542), 2022-06-14
Supplement: s1 [file s1]

Supplementary Table S1: Keywords (top 10) within clusters related to the papers (top 5)

| Cluster Labels | Keyword Time-cited | Keyword (top 10) | Title                                                                                                                                                                 | First Author       | Citations (top 5) | DOI                               |
|----------------|--------------------|------------------|-----------------------------------------------------------------------------------------------------------------------------------------------------------------------|--------------------|-------------------|-----------------------------------|
|                | 430                | metabolomics     | Quantitative Serum Nuclear Magnetic Resonance Metabolomics in Cardiovascular Epidemiology and                                                                         | Soininen, Pasi     | 227               | 10.1111/j.2047-6310.2012.00087.x  |
|                |                    |                  | Circulating branched-chain amino acid concentrations are associated with obesity and future insulin resistance in children and adolescents                            | McCormack, S E     | 209               | 10.1111/j.2047-6310.2012.00087.x  |
|                |                    |                  | Serum metabolomics reveals gamma-glutamyl dipeptides as biomarkers for discrimination among different forms of liver disease                                          | Soga, Tomoyoshi    | 145               | 10.1016/j.jhep.2011.01.031        |
|                |                    |                  | A diabetes-predictive amino acid score and future cardiovascular disease                                                                                              | Magnusson, Martin  | 139               | 10.1093/eurheartj/ehs424          |
|                |                    |                  | Combined Proteomic and Metabolomic Profiling of Serum Reveals Association of the Complement System with Obesity and Identifies Novel Markers of Body Fat Mass Changes | Oberbach, Andreas  | 135               | 10.1021/pr2005555                 |
|                | 148                | biomarker        | Proposed minimum reporting standards for data analysis in metabolomics                                                                                                | Goodacre, Royston  | 247               | 10.1007/s11306-007-0081-3         |
|                |                    |                  | The dynamic range of the human metabolome revealed by challenges                                                                                                      | Krug, Susanne      | 189               | 10.1096/fj.11-198093              |
|                |                    |                  | Serum metabolomics reveals gamma-glutamyl dipeptides as biomarkers for discrimination among different forms of liver disease                                          | Soga, Tomoyoshi    | 145               | 10.1016/j.jhep.2011.01.031        |
|                |                    |                  | Potential metabolite markers of schizophrenia                                                                                                                         | Yang, J            | 122               | 10.1038/mp.2011.131               |
|                |                    |                  | A Novel Serum Metabolomics-Based Diagnostic Approach to Pancreatic Cancer                                                                                             | Kobayashi, Takashi | 108               | 10.1158/1055-9965.EPI-12-1033     |
|                |                    |                  | A Novel Serum Metabolomics-Based Diagnostic Approach for Colorectal                                                                                                   | Nishiumi, Shin     | 154               | 10.1371/journal.pone.0040459      |
|                |                    |                  | Long-term Leisure-time Physical Activity and Serum Metabolome                                                                                                         | Kujala, Urho M     | 109               | 10.1161/CIRCULATIONAHA.112.105551 |

|                            |    |                   |                                                                                                                                                                           |                      |     |                                  |
|----------------------------|----|-------------------|---------------------------------------------------------------------------------------------------------------------------------------------------------------------------|----------------------|-----|----------------------------------|
| #0<br>colorectal<br>cancer | 83 | plasma            | Metabolomic profiling of dietary-induced insulin resistance in the high fat-fed C57BL/6J mouse                                                                            | Shearer, J           | 94  | 10.1111/j.1463-1326.2007.00837.x |
|                            |    |                   | Metabolomics in Epidemiology: Sources of Variability in Metabolite Measurements and Implications                                                                          | Sampson, Joshua N    | 83  | 10.1158/1055-9965.EPI-12-1109    |
|                            |    |                   | Metabolic and hormonal responses to isoenergetic high-intensity interval exercise and continuous moderate-intensity exercise                                              | Peake, Jonathan M    | 70  | 10.1152/ajpendo.00276.2014       |
|                            | 76 | mass spectrometry | The dynamic range of the human metabolome revealed by challenges                                                                                                          | Krug, Susanne        | 189 | 10.1096/fj.11-198093             |
|                            |    |                   | A Novel Serum Metabolomics-Based Diagnostic Approach for Colorectal                                                                                                       | Nishiumi, Shin       | 154 | 10.1371/journal.pone.0040459     |
|                            |    |                   | Metabolomic NMR Fingerprinting to Identify and Predict Survival of Patients with Metastatic Colorectal Cancer                                                             | Bertini, Ivano       | 113 | 10.1158/0008-5472.CAN-11-1543    |
|                            |    |                   | A Novel Serum Metabolomics-Based Diagnostic Approach to Pancreatic Cancer                                                                                                 | Kobayashi, Takashi   | 108 | 10.1158/1055-9965.EPI-12-1033    |
|                            |    |                   | A multivariate screening strategy for investigating metabolic effects of strenuous physical exercise in human serum                                                       | Pohjanen, Elin       | 85  | 10.1021/pr070007g                |
|                            | 74 | identification    | Proposed minimum reporting standards for data analysis in metabolomics                                                                                                    | Goodacre, Royston    | 247 | 10.1007/s11306-007-0081-3        |
|                            |    |                   | A Novel Serum Metabolomics-Based Diagnostic Approach to Pancreatic Cancer                                                                                                 | Kobayashi, Takashi   | 108 | 10.1158/1055-9965.EPI-12-1033    |
|                            |    |                   | Human metabolic correlates of body mass index                                                                                                                             | Moore, Steven C      | 87  | 10.1007/s11306-013-0574-1        |
|                            |    |                   | Virtual Quantification of Metabolites by Capillary Electrophoresis-Electrospray Ionization-Mass Spectrometry: Predicting Ionization Efficiency Without Chemical Standards | Chalcraft, Kenneth R | 85  | 10.1021/ac802272u                |
|                            |    |                   | Medium Chain Acylcarnitines Dominate the Metabolite Pattern in Humans under Moderate Intensity Exercise and Support Lipid Oxidation                                       | Lehmann, Rainer      | 81  | 10.1371/journal.pone.0011519     |

|    |              |                                                                                                                                                                                                              |                    |     |                              |
|----|--------------|--------------------------------------------------------------------------------------------------------------------------------------------------------------------------------------------------------------|--------------------|-----|------------------------------|
| 68 | metabonomics | Investigations of the effects of gender, diurnal variation, and age in human urinary metabolomic profiles                                                                                                    | Slupsky, Carolyn M | 283 | 10.1021/ac0708588            |
|    |              | Analysis of metabolomic data using support vector machines                                                                                                                                                   | Mahadevan, Sankar  | 216 | 10.1021/ac800954c            |
|    |              | Identification and Validation of Urinary Metabolite Biomarkers for Major Depressive Disorder                                                                                                                 | Zheng, Peng        | 126 | 10.1074/mcp.M112.021816      |
|    |              | Distinct Urinary Metabolic Profile of Human Colorectal Cancer                                                                                                                                                | Cheng, Yu          | 124 | 10.1021/pr201001a            |
|    |              | International NMR-Based Environmental Metabolomics Intercomparison Exercise                                                                                                                                  | Viant, Mark R      | 112 | 10.1021/es802198z            |
| 55 | serum        | Metabolomics as a Tool for Discovery of Biomarkers of Autism Spectrum Disorder in the Blood Plasma of Children                                                                                               | West, Paul R       | 93  | 10.1371/journal.pone.0112445 |
|    |              | High-throughput H-1 NMR-based metabolic analysis of human serum and urine for large-scale epidemiological studies: validation study                                                                          | Barton, Richard H  | 89  | 10.1093/ije/dym284           |
|    |              | Metabolomic Profiling of Serum from Human Pancreatic Cancer Patients Using H-1 NMR Spectroscopy and Principal Component Analysis                                                                             | OuYang, Dong       | 68  | 10.1007/s12010-011-9240-0    |
|    |              | Metabolomics provide new insights on lung cancer staging and discrimination from chronic obstructive pulmonary disease                                                                                       | Deja, Stanislaw    | 59  | 10.1016/j.jpba.2014.08.020   |
|    |              | Comparing metabolite profiles of habitual diet in serum and urine                                                                                                                                            | Playdon, Mary C    | 59  | 10.3945/ajcn.116.135301      |
|    |              | Tissue imaging and serum lipidomic profiling for screening potential biomarkers of thyroid tumors by matrix-assisted laser desorption/ionization-Fourier transform ion cyclotron resonance mass spectrometry | Guo, Shuai         | 38  | 10.1007/s00216-014-7846-0    |

|  |    |                   |                                                                                                                                               |                      |     |                                   |
|--|----|-------------------|-----------------------------------------------------------------------------------------------------------------------------------------------|----------------------|-----|-----------------------------------|
|  | 45 | acid              | Metabolomics insights into early type 2 diabetes pathogenesis and detection in individuals with normal fasting glucose                        | Merino, Jordi        | 31  | 10.1007/s00125-018-4599-x         |
|  |    |                   | Bananas as an Energy Source during Exercise: A Metabolomics Approach                                                                          | Nieman, David C      | 30  | 10.1371/journal.pone.0037479      |
|  |    |                   | Effects of exposure to water disinfection by-products in a swimming pool: A metabolome-wide association study                                 | van Veldhoven, Karin | 27  | 10.1016/j.envint.2017.11.017      |
|  |    |                   | Response of Gut Microbiota to Metabolite Changes Induced by Endurance Exercise                                                                | Zhao, Xia            | 26  | 10.3389/fmicb.2018.00765          |
|  | 41 | profile           | A diabetes-predictive amino acid score and future cardiovascular disease                                                                      | Magnusson, Martin    | 139 | 10.1093/eurheartj/ehs424          |
|  |    |                   | Long-term Leisure-time Physical Activity and Serum Metabolome                                                                                 | Kujala, Urho M       | 109 | 10.1161/CIRCULATIONAHA.112.105551 |
|  |    |                   | Multivariate Modeling and Prediction of Breast Cancer Prognostic Factors Using MR Metabolomics                                                | Giskeodegard, Guro F | 100 | 10.1021/pr9008783                 |
|  |    |                   | Integrating Omic Technologies into Aquatic Ecological Risk Assessment and Environmental Monitoring: Hurdles, Achievements, and Future Outlook | Van Aggelen, Graham  | 99  | 10.1289/ehp.0900985               |
|  |    |                   | Metabolomics as a Tool for Discovery of Biomarkers of Autism Spectrum Disorder in the Blood Plasma of Children                                | West, Paul R         | 93  | 10.1371/journal.pone.0112445      |
|  | 78 | physical activity | Metabolic Signatures of Adiposity in Young Adults: Mendelian Randomization Analysis and Effects of Weight Change                              | Wurtz, Peter         | 135 | 10.1371/journal.pmed.1001765      |
|  |    |                   | Human metabolic correlates of body mass index                                                                                                 | Moore, Steven C      | 87  | 10.1007/s11306-013-0574-1         |
|  |    |                   | Clinical and Metabolic Characterization of Lean Caucasian Subjects With Non-alcoholic Fatty Liver                                             | Feldman, Alexandra   | 73  | 10.1038/ajg.2016.318              |
|  |    |                   | Metabolite patterns predicting sex and age in participants of the Karlsruhe Metabolomics and Nutrition (KarMeN) study                         | Rist, Manuela J      | 54  | 10.1371/journal.pone.0183228      |

|    |                    |                                                                                                                                                                       |                    |     |                                   |
|----|--------------------|-----------------------------------------------------------------------------------------------------------------------------------------------------------------------|--------------------|-----|-----------------------------------|
|    |                    | Linking diet, physical activity, cardiorespiratory fitness and obesity to serum metabolite networks: findings from a population-based study                           | Floegel, A         | 52  | 10.1038/ijo.2014.39               |
| 66 | obesity            | Combined Proteomic and Metabolomic Profiling of Serum Reveals Association of the Complement System with Obesity and Identifies Novel Markers of Body Fat Mass Changes | Oberbach, Andreas  | 135 | 10.1021/pr2005555                 |
|    |                    | Metabolic Signatures of Adiposity in Young Adults: Mendelian Randomization Analysis and Effects of Weight Change                                                      | Wurtz, Peter       | 135 | 10.1371/journal.pmed.1001765      |
|    |                    | Long-term Leisure-time Physical Activity and Serum Metabolome                                                                                                         | Kujala, Urho M     | 109 | 10.1161/CIRCULATIONAHA.112.105551 |
|    |                    | Human metabolic correlates of body mass index                                                                                                                         | Moore, Steven C    | 87  | 10.1007/s11306-013-0574-1         |
|    |                    | Clinical and Metabolic Characterization of Lean Caucasian Subjects With Non-alcoholic Fatty Liver                                                                     | Feldman, Alexandra | 73  | 10.1038/ajg.2016.318              |
| 64 | insulin resistance | Quantitative Serum Nuclear Magnetic Resonance Metabolomics in Cardiovascular Epidemiology and                                                                         | Soininen, Pasi     | 227 | 10.1161/CIRCGENETICS.114.000216   |
|    |                    | Circulating branched-chain amino acid concentrations are associated with obesity and future insulin resistance in children and adolescents                            | McCormack, S E     | 209 | 10.1111/j.2047-6310.2012.00087.x  |
|    |                    | A diabetes-predictive amino acid score and future cardiovascular disease                                                                                              | Magnusson, Martin  | 139 | 10.1093/eurheartj/ehs424          |
|    |                    | Human metabolic correlates of body mass index                                                                                                                         | Moore, Steven C    | 87  | 10.1007/s11306-013-0574-1         |
|    |                    | Clinical and Metabolic Characterization of Lean Caucasian Subjects With Non-alcoholic Fatty Liver                                                                     | Feldman, Alexandra | 73  | 10.1038/ajg.2016.318              |
|    |                    | A diabetes-predictive amino acid score and future cardiovascular disease                                                                                              | Magnusson, Martin  | 139 | 10.1093/eurheartj/ehs424          |
|    |                    | Human metabolic correlates of body mass index                                                                                                                         | Moore, Steven C    | 87  | 10.1007/s11306-013-0574-1         |

|               |    |            |                                                                                                                                                    |                    |     |                                     |
|---------------|----|------------|----------------------------------------------------------------------------------------------------------------------------------------------------|--------------------|-----|-------------------------------------|
| #1<br>obesity | 60 | risk       | Metabolomics in Epidemiology: Sources of Variability in Metabolite Measurements and Implications                                                   | Sampson, Joshua N  | 83  | 10.1158/1055-9965.EPI-12-1109       |
|               |    |            | Metabolic biomarker signature to differentiate pancreatic ductal adenocarcinoma from chronic pancreatitis                                          | Mayerle, Julia     | 53  | 10.1136/gutjnl-2016-312432          |
|               |    |            | Linking diet, physical activity, cardiorespiratory fitness and obesity to serum metabolite networks: findings from a population-based study        | Floegel, A         | 52  | 10.1038/ijo.2014.39                 |
|               | 50 | disease    | Harmonizing lipidomics: NIST interlaboratory comparison exercise for lipidomics using SRM 1950-Metabolites in Frozen Human Plasma                  | Bowden, John A     | 120 | 10.1194/jlr.M079012                 |
|               |    |            | Energy Metabolic Reprogramming in the Hypertrophied and Early Stage Failing Heart A Multisystems Approach                                          | Lai, Ling          | 109 | 10.1161/CIRCHEARTFAILURE.114.001469 |
|               |    |            | Clinical and Metabolic Characterization of Lean Caucasian Subjects With Non-alcoholic Fatty Liver                                                  | Feldman, Alexandra | 73  | 10.1038/ajg.2016.318                |
|               |    |            | Prognostic Implications of Long-Chain Acylcarnitines in Heart Failure and Reversibility With Mechanical Circulatory Support                        | Ahmad, Tariq       | 57  | 10.1016/j.jacc.2015.10.079          |
|               |    |            | Urinary metabolic profiles in early pregnancy are associated with preterm birth and fetal growth restriction in the Rhea mother-child cohort study | Maitre, Lea        | 45  | 10.1186/1741-7015-12-110            |
|               | 43 | amino acid | Quantitative Serum Nuclear Magnetic Resonance Metabolomics in Cardiovascular Epidemiology and                                                      | Soininen, Pasi     | 227 | 10.1161/CIRCGENETICS.114.000216     |
|               |    |            | A diabetes-predictive amino acid score and future cardiovascular disease                                                                           | Magnusson, Martin  | 139 | 10.1093/eurheartj/ehs424            |
|               |    |            | Potential metabolite markers of schizophrenia                                                                                                      | Yang, J            | 122 | 10.1038/mp.2011.131                 |
|               |    |            | Long-term Leisure-time Physical Activity and Serum Metabolome                                                                                      | Kujala, Urho M     | 109 | 10.1161/CIRCULATIONAHA.112.105551   |

|    |        |                                                                                                                                                  |                          |    |                              |
|----|--------|--------------------------------------------------------------------------------------------------------------------------------------------------|--------------------------|----|------------------------------|
|    |        | Metabolomics as a Tool for Discovery of Biomarkers of Autism Spectrum Disorder in the Blood Plasma of Children                                   | West, Paul R             | 93 | 10.1371/journal.pone.0112445 |
| 31 | diet   | Comparing metabolite profiles of habitual diet in serum and urine                                                                                | Playdon, Mary C          | 59 | 10.3945/ajcn.116.135301      |
|    |        | Linking diet, physical activity, cardiorespiratory fitness and obesity to serum metabolite networks: findings from a population-based study      | Floegel, A               | 52 | 10.1038/ijo.2014.39          |
|    |        | Influence of weight reduction on blood levels of C-reactive protein, tumor necrosis factor-alpha, interleukin-6, and oxylipins in obese subjects | Moeller, Katharina       | 24 | 10.1016/j.plefa.2015.12.001  |
|    |        | The impact of free or standardized lifestyle and urine sampling protocol on metabolome recognition accuracy                                      | Wallner-Liebmann, Sandra | 22 | 10.1007/s12263-014-0441-3    |
|    |        | Specific appetite, energetic and metabolomics responses to fat overfeeding in resistant-to-bodyweight-gain constitutional thinness               | Germain, N               | 18 | 10.1038/nutd.2014.17         |
| 29 | health | Combined Application of NMR- and GC-MS-Based Metabonomics Yields a Superior Urinary Biomarker Panel for Bipolar Disorder                         | Chen, Jian-jun           | 48 | 10.1038/srep05855            |
|    |        | Associations Between Metabolomic Compounds and Incident Heart Failure Among African Americans: The ARIC                                          | Zheng, Yan               | 40 | 10.1093/aje/kwt004           |
|    |        | Novel Multimetabolite Prediction of Walnut Consumption by a Urinary Biomarker Model in a Free-Living Population: the PREDIMED Study              | Garcia-Aloy, Mar         | 35 | 10.1021/pr500425r            |
|    |        | Effects of a Flavonoid-Rich Juice on Inflammation, Oxidative Stress, and Immunity in Elite Swimmers: A Metabolomics-Based Approach               | Knab, Amy M              | 32 | 10.1123/ijsnem.23.2.150      |
|    |        | Objectively measured physical activity and plasma metabolomics in the Shanghai Physical Activity Study                                           | Xiao, Qian               | 28 | 10.1093/ije/dyw033           |

|  |    |              |                                                                                                                                                               |                          |    |                                |
|--|----|--------------|---------------------------------------------------------------------------------------------------------------------------------------------------------------|--------------------------|----|--------------------------------|
|  | 28 | inflammation | Sex hormone-binding globulin associations with circulating lipids and metabolites and the risk for type 2 diabetes: observational and causal effect estimates | Wang, Qin                | 51 | 10.1093/ije/dyv093             |
|  |    |              | Breath metabolomic profiling by nuclear magnetic resonance spectroscopy in asthma                                                                             | Ibrahim, B               | 41 | 10.1111/all.12211              |
|  |    |              | Purine metabolism is dysregulated in patients with major depressive disorder                                                                                  | Ali-Sisto, Toni          | 38 | 10.1016/j.psyneuen.2016.04.017 |
|  |    |              | Metabolomics-Based Analysis of Banana and Pear Ingestion on Exercise Performance and Recovery                                                                 | Nieman, David C          | 31 | 10.1021/acs.jproteome.5b00909  |
|  |    |              | Molecular alterations in skeletal muscle in rheumatoid arthritis are related to disease activity, physical inactivity, and disability                         | Huffman, Kim M           | 28 | 10.1186/s13075-016-1215-7      |
|  | 27 | association  | Meta-analysis of fecal metagenomes reveals global microbial signatures that are specific for colorectal cancer                                                | Wirbel, Jakob            | 93 | 10.1038/s41591-019-0406-6      |
|  |    |              | Circulating Branched-Chain Amino Acids and Incident Cardiovascular Disease in a Prospective Cohort of US Women                                                | Tobias, Deirdre K        | 33 | 10.1161/CIRCGEN.118.002157     |
|  |    |              | The ColoCare Study: A Paradigm of Transdisciplinary Science in Colorectal Cancer Outcomes                                                                     | Ulrich, Cornelia M       | 15 | 10.1158/1055-9965.EPI-18-0773  |
|  |    |              | Phthalate exposure and childhood overweight and obesity: Urinary metabolomic evidence                                                                         | Xia, Bin                 | 14 | 10.1016/j.envint.2018.09.001   |
|  |    |              | LC-MS-based serum fingerprinting reveals significant dysregulation of phospholipids in chronic heart failure                                                  | Marcinkiewicz-Siemion, M | 5  | 10.1016/j.jpba.2018.03.027     |
|  |    |              | Metabolomics as a Tool for Discovery of Biomarkers of Autism Spectrum Disorder in the Blood Plasma of Children                                                | West, Paul R             | 93 | 10.1371/journal.pone.0112445   |



|  |    |                  |                                                                                                                                                                             |                      |    |                               |
|--|----|------------------|-----------------------------------------------------------------------------------------------------------------------------------------------------------------------------|----------------------|----|-------------------------------|
|  | 41 | performance      | Influence of a Polyphenol-Enriched Protein Powder on Exercise-Induced Inflammation and Oxidative Stress in Athletes: A Randomized Trial Using a Metabolomics Approach       | Nieman, David C      | 54 | 10.1371/journal.pone.0072215  |
|  |    |                  | Metabolic biomarker signature to differentiate pancreatic ductal adenocarcinoma from chronic pancreatitis                                                                   | Mayerle, Julia       | 53 | 10.1136/gutjnl-2016-312432    |
|  |    |                  | Study of Induction Chemotherapy Efficacy in Oral Squamous Cell Carcinoma Using Pseudotargeted Metabolomics                                                                  | Ye, Guozhu           | 53 | 10.1021/pr4011298             |
|  |    |                  | The Muscle Metabolome Differs between Healthy and Frail Older Adults                                                                                                        | Fazelzadeh, Parastoo | 33 | 10.1021/acs.jproteome.5b00840 |
|  | 33 | oxidative stress | Metabolomics approach to assessing plasma 13-and 9-hydroxy-octadecadienoic acid and linoleic acid metabolite responses to 75-km cycling                                     | Nieman, David C      | 38 | 10.1152/ajpregu.00092.2014    |
|  |    |                  | Physical fitness level is reflected by alterations in the human plasma metabolome                                                                                           | Chorell, Elin        | 35 | 10.1039/c2mb05428k            |
|  |    |                  | Bananas as an Energy Source during Exercise: A Metabolomics Approach                                                                                                        | Nieman, David C      | 30 | 10.1371/journal.pone.0037479  |
|  |    |                  | Targeted Metabolomics Connects Thioredoxin-interacting Protein (TXNIP) to Mitochondrial Fuel Selection and Regulation of Specific Oxidoreductase Enzymes in Skeletal Muscle | DeBalsi, Karen L     | 29 | 10.1074/jbc.M113.511535       |
|  |    |                  | A pilot study comparing the metabolic profiles of elite-level athletes from different sporting disciplines                                                                  | Al-Khelaifi, Fatima  | 27 | 10.1186/s40798-017-0114-z     |
|  |    |                  | Prognostic Implications of Long-Chain Acylcarnitines in Heart Failure and Reversibility With Mechanical Circulatory Support                                                 | Ahmad, Tariq         | 57 | 10.1016/j.jacc.2015.10.079    |
|  |    |                  | A pilot study comparing the metabolic profiles of elite-level athletes from different sporting disciplines                                                                  | Al-Khelaifi, Fatima  | 27 | 10.1186/s40798-017-0114-z     |

|  |    |            |                                                                                                                                                          |                      |    |                               |
|--|----|------------|----------------------------------------------------------------------------------------------------------------------------------------------------------|----------------------|----|-------------------------------|
|  | 23 | muscle     | The Intersection of Aging Biology and the Pathobiology of Lung Diseases: A Joint NHLBI/NIA Workshop                                                      | Budinger, G R Scott  | 22 | 10.1093/gerona/glx090         |
|  |    |            | The ACTN3 R577X Polymorphism Is Associated with Cardiometabolic Fitness in Healthy Young Adults                                                          | Deschamps, Chelsea L | 21 | 10.1371/journal.pone.0130644  |
|  |    |            | Understanding the response to endurance exercise using a systems biology approach: combining blood metabolomics, transcriptomics and miRNomics in horses | Mach, Nuria          | 17 | 10.1186/s12864-017-3571-3     |
|  | 22 | metabolome | The maternal-age-associated risk of congenital heart disease is modifiable                                                                               | Schulkey, Claire E   | 39 | 10.1038/nature14361           |
|  |    |            | Effects of exposure to water disinfection by-products in a swimming pool: A metabolome-wide association study                                            | van Veldhoven, Karin | 27 | 10.1016/j.envint.2017.11.017  |
|  |    |            | Characterisation of the faecal metabolome and microbiome of Thoroughbred racehorses                                                                      | Proudman, C J        | 25 | 10.1111/evj.12324             |
|  |    |            | Effects of sleep restriction on the human plasma metabolome                                                                                              | Bell, Lauren N       | 23 | 10.1016/j.physbeh.2013.08.007 |
|  |    |            | Predictive diagnosis of major depression using NMR-based metabolomics and least-squares support vector machine                                           | Zheng, Hong          | 18 | 10.1016/j.cca.2016.11.039     |
|  | 21 | model      | Dominant components of the Thoroughbred metabolome characterised by H-1-nuclear magnetic resonance spectroscopy: A metabolite atlas of common biofluids  | Escalona, E E        | 21 | 10.1111/evj.12333             |
|  |    |            | Understanding the response to endurance exercise using a systems biology approach: combining blood metabolomics, transcriptomics and miRNomics in horses | Mach, Nuria          | 17 | 10.1186/s12864-017-3571-3     |
|  |    |            | PLS-Based and Regularization-Based Methods for the Selection of Relevant Variables in Non-targeted Metabolomics Data                                     | Bujak, Renata        | 17 | 10.3389/fmolb.2016.00035 PG   |

|                        |    |                   |                                                                                                                                               |                                |     |                                   |
|------------------------|----|-------------------|-----------------------------------------------------------------------------------------------------------------------------------------------|--------------------------------|-----|-----------------------------------|
| #2<br>oxidative stress |    |                   | Biomarkers in amyotrophic lateral sclerosis: combining metabolomic and clinical parameters to define disease                                  | Blasco, H                      | 12  | 10.1111/ene.12851                 |
|                        |    |                   | Artificial Neural Network for Probabilistic Feature Recognition in Liquid Chromatography Coupled to High-Resolution Mass Spectrometry         | Woldegebr<br>iel, Michael      | 12  | 10.1021/acs.analchem.6b03678      |
|                        | 21 | response          | Integrating Omic Technologies into Aquatic Ecological Risk Assessment and Environmental Monitoring: Hurdles, Achievements, and Future Outlook | Van<br>Aggelen,<br>Graham      | 99  | 10.1289/ehp.0900985               |
|                        |    |                   | H-1 NMR-Based Metabonomic Investigation of the Effect of Two Different Exercise Sessions on the Metabolic Fingerprint of Human Urine          | Pechlivanis<br>,<br>Alexandros | 80  | 10.1021/pr100684t                 |
|                        |    |                   | H-1 NMR Study on the Short- and Long-Term Impact of Two Training Programs of Sprint Running on the Metabolic Fingerprint of Human Serum       | Pechlivanis<br>,<br>Alexandros | 47  | 10.1021/pr300846x                 |
|                        |    |                   | Effects of a Flavonoid-Rich Juice on Inflammation, Oxidative Stress, and Immunity in Elite Swimmers: A Metabolomics-Based Approach            | Knab, Amy<br>M                 | 32  | 10.1123/ijsnem.23.2.150           |
|                        |    |                   | Identification of serum analytes and metabolites associated with aerobic capacity                                                             | Lustgarten,<br>Michael S       | 24  | 10.1007/s00421-012-2555-x         |
|                        | 15 | physical exercise | Long-term Leisure-time Physical Activity and Serum Metabolome                                                                                 | Kujala,<br>Urho M              | 109 | 10.1161/CIRCULATIONAHA.112.105551 |
|                        |    |                   | H-1 NMR-Based Metabonomic Investigation of the Effect of Two Different Exercise Sessions on the Metabolic Fingerprint of Human Urine          | Pechlivanis<br>,<br>Alexandros | 80  | 10.1021/pr100684t                 |
|                        |    |                   | H-1 NMR-based metabolomics approach for exploring urinary metabolome modifications after acute and chronic physical exercise                  | Enea, C                        | 64  | 10.1007/s00216-009-3289-4 PG 10   |

|    |                 |                                                                                                                                                                     |                          |     |                              |
|----|-----------------|---------------------------------------------------------------------------------------------------------------------------------------------------------------------|--------------------------|-----|------------------------------|
|    |                 | H-1 NMR Study on the Short- and Long-Term Impact of Two Training Programs of Sprint Running on the Metabolic Fingerprint of Human Serum                             | Pechlivanis , Alexandros | 47  | 10.1021/pr300846x            |
|    |                 | Metabolomics investigation of exercise-modulated changes in metabolism in rat liver after exhaustive and endurance exercises                                        | Huang, Chi-Chang         | 44  | 10.1007/s00421-009-1247-7    |
| 14 | systems biology | Metabolomics Workbench: An international repository for metabolomics data and metadata, metabolite standards, protocols, tutorials and training, and analysis tools | Sud, Manish              | 175 | 10.1093/nar/gkv1042          |
|    |                 | International NMR-Based Environmental Metabolomics Intercomparison Exercise                                                                                         | Viant, Mark R            | 112 | 10.1021/es802198z            |
|    |                 | Nuclear magnetic resonance-based metabolomics predicts exercise-induced ischemia in patients with suspected coronary artery disease                                 | Barba, Ignasi            | 56  | 10.1002/mrm.21632            |
|    |                 | Evaluation of regression models in metabolic physiology: predicting fluxes from isotopic data without knowledge of the pathway                                      | Antoniewicz, Maciek R    | 33  | 10.1007/s11306-006-0018-2    |
|    |                 | Whole Blood Transcriptomics and Urinary Metabolomics to Define Adaptive Biochemical Pathways of High-Intensity Exercise in 50-60 Year Old Masters Athletes          | Mukherjee, Kamalika      | 25  | 10.1371/journal.pone.0092031 |
| 13 | stress          | Identification and Validation of Urinary Metabolite Biomarkers for Major Depressive Disorder                                                                        | Zheng, Peng              | 126 | 10.1074/mcp.M112.021816      |
|    |                 | A pilot study comparing the metabolic profiles of elite-level athletes from different sporting disciplines                                                          | Al-Khelaifi, Fatima      | 27  | 10.1186/s40798-017-0114-z    |
|    |                 | Identification of serum analytes and metabolites associated with aerobic capacity                                                                                   | Lustgarten, Michael S    | 24  | 10.1007/s00421-012-2555-x    |

|  |    |         |                                                                                                                                                           |                     |     |                               |
|--|----|---------|-----------------------------------------------------------------------------------------------------------------------------------------------------------|---------------------|-----|-------------------------------|
|  |    |         | Metabolic time-course response after resistance exercise: A metabolomics approach                                                                         | Berton, Ricardo     | 22  | 10.1080/02640414.2016.1218035 |
|  |    |         | Understanding the response to endurance exercise using a systems biology approach: combining blood metabolomics, transcriptomics and miRNomics in horses  | Mach, Nuria         | 17  | 10.1186/s12864-017-3571-3     |
|  | 9  | liver   | Effects of Intra- and Post-Operative Ischemia on the Metabolic Profile of Clinical Liver Tissue Specimens Monitored by NMR                                | Cacciatore, Stefano | 22  | 10.1021/pr400702d             |
|  |    |         | Serum Metabolomics Analysis Reveals a Distinct Metabolic Profile of Patients with Primary Biliary Cholangitis                                             | Hao, Juan           | 13  | 10.1038/s41598-017-00944-9    |
|  |    |         | Exercise-Induced Alterations in Skeletal Muscle, Heart, Liver, and Serum Metabolome Identified by Non-Targeted Metabolomics Analysis                      | Starnes, Joseph W   | 11  | 10.3390/metabo7030040         |
|  |    |         | AICAR stimulation metabolome widely mimics electrical contraction in isolated rat epitrochlearis muscle                                                   | Miyamoto, Licht     | 10  | 10.1152/ajpcell.00162.2013    |
|  |    |         | Serum metabolomics reveals the mechanistic role of functional foods and exercise for obesity management in rats                                           | Ammar, Naglaa M     | 6   | 10.1016/j.jpba.2017.05.001    |
|  | 21 | protein | Serum metabolomics reveals gamma-glutamyl dipeptides as biomarkers for discrimination among different forms of liver disease                              | Soga, Tomoyoshi     | 145 | 10.1016/j.jhep.2011.01.031    |
|  |    |         | Comparative metabolomics of estrogen receptor positive and estrogen receptor negative breast cancer: alterations in glutamine and beta-alanine metabolism | Budczies, Jan       | 81  | 10.1016/j.jprot.2013.10.002   |
|  |    |         | Linking diet, physical activity, cardiorespiratory fitness and obesity to serum metabolite networks: findings from a population-based study               | Floegel, A          | 52  | 10.1038/ijo.2014.39           |

|    |                  |                                                                                                                                           |                         |    |                               |
|----|------------------|-------------------------------------------------------------------------------------------------------------------------------------------|-------------------------|----|-------------------------------|
| 13 |                  | Metabolomic profiles as reliable biomarkers of dietary composition                                                                        | Esko, Tonu              | 39 | 10.3945/ajcn.116.144428       |
|    |                  | Diagnosis of major depressive disorder based on changes in multiple plasma neurotransmitters: a targeted metabolomics study               | Pan, Jun-Xi             | 31 | 10.1038/s41398-018-0183-x     |
|    | supplementation  | Metabolomics-Based Analysis of Banana and Pear Ingestion on Exercise Performance and Recovery                                             | Nieman, David C         | 31 | 10.1021/acs.jproteome.5b00909 |
|    |                  | Personalized Metabolomics for Predicting Glucose Tolerance Changes in Sedentary Women After High-Intensity Interval Training              | Kuehnbaum, Naomi L      | 27 | 10.1038/srep06166             |
|    |                  | Sportomics: Building a new concept in metabolic studies and exercise science                                                              | Bassini, Adriana        | 22 | 10.1016/j.bbrc.2013.12.137    |
|    |                  | Metabolomics studies on db/db diabetic mice in skeletal muscle reveal effective clearance of overloaded intermediates by exercise         | Xiang, Li               | 14 | 10.1016/j.aca.2017.11.082     |
|    |                  | Metabolomics analysis of serum reveals the effect of Danggui Buxue Tang on fatigued mice induced by exhausting physical exercise          | Miao, Xiaoyao           | 12 | 10.1016/j.jpba.2018.01.028    |
|    | nmr spectroscopy | Metabolomics provide new insights on lung cancer staging and discrimination from chronic obstructive pulmonary disease                    | Deja, Stanislaw         | 59 | 10.1016/j.jpba.2014.08.020    |
|    |                  | Metabolomics study of esophageal adenocarcinoma                                                                                           | Zhang, Jian             | 47 | 0.1016/j.jtcvs.2010.08.025    |
|    |                  | Metabolomics-Derived Prostate Cancer Biomarkers: Fact or Fiction?                                                                         | Kumar, Deepak           | 37 | 10.1021/pr5011108             |
|    |                  | Monitoring the Response of the Human Urinary Metabolome to Brief Maximal Exercise by a Combination of RP-UPLC-MS and H-1 NMR Spectroscopy | Pechlivanis, Alexandros | 24 | 10.1021/acs.jproteome.5b00470 |

|  |    |           |                                                                                                                                                                                                                            |                          |     |                              |
|--|----|-----------|----------------------------------------------------------------------------------------------------------------------------------------------------------------------------------------------------------------------------|--------------------------|-----|------------------------------|
|  |    |           | Dominant components of the Thoroughbred metabolome characterised by H-1-nuclear magnetic resonance spectroscopy: A metabolite atlas of common biofluids                                                                    | Escalona, E E            | 21  | 10.1111/evj.12333            |
|  | 11 | mortality | Metabolic Signatures of Adiposity in Young Adults: Mendelian Randomization Analysis and Effects of Weight Change                                                                                                           | Wurtz, Peter             | 135 | 10.1371/journal.pmed.1001765 |
|  |    |           | Metabolomic Profiling of Serum from Human Pancreatic Cancer Patients Using H-1 NMR Spectroscopy and Principal Component Analysis                                                                                           | OuYang, Dong             | 68  | 10.1007/s12010-011-9240-0    |
|  |    |           | A family based tailored counselling to increase non-exercise physical activity in adults with a sedentary job and physical activity in their young children: design and methods of a year-long randomized controlled trial | Finni, Taija             | 19  | 10.1186/1471-2458-11-944     |
|  |    |           | Serum Metabolites Related to Cardiorespiratory Fitness, Physical Activity Energy Expenditure, Sedentary Time and Vigorous Activity                                                                                         | Wientzek, Angelika       | 10  | 10.1123/ijsnem.2013-0048     |
|  |    |           | A plasma metabolite panel as biomarkers for early primary breast cancer detection                                                                                                                                          | Yuan, Baowen             | 9   | 10.1002/ijc.31996            |
|  | 10 | nutrition | Linking diet, physical activity, cardiorespiratory fitness and obesity to serum metabolite networks: findings from a population-based study                                                                                | Floegel, A               | 52  | 10.1038/ijo.2014.39          |
|  |    |           | Personalized nutrition and obesity                                                                                                                                                                                         | Qi, Lu                   | 16  | 10.3109/07853890.2014.891802 |
|  |    |           | Near-infrared spectroscopy and partial least squares-class modeling (PLS-CM) for metabolomics fingerprinting discrimination of intervention breakfasts ingested by obese individuals                                       | Alvarez-Sanchez, Beatriz | 8   | 10.1002/cem.2526             |
|  |    |           | Metabolomics profiling of xenobiotics in elite athletes: relevance to supplement consumption                                                                                                                               | Al-Khelaifi, Fatima      | 7   | 10.1186/s12970-018-0254-7    |

|                     |    |         |                                                                                                                                                                                           |                       |     |                              |
|---------------------|----|---------|-------------------------------------------------------------------------------------------------------------------------------------------------------------------------------------------|-----------------------|-----|------------------------------|
| <p>hypertension</p> |    |         | Micronutrient Research, Programs, and Policy: From Meta-analyses to Metabolomics                                                                                                          | Allen, Lindsay H      | 6   | 10.3945/an.113.005421        |
|                     | 10 | m       | Large-Scale Prediction of Collision Cross-Section Values for Metabolites in Ion Mobility-Mass Spectrometry                                                                                | Zhou, Zhiwei          | 70  | 10.1021/acs.analchem.6b03091 |
|                     |    |         | Metabolomics Data Normalization with EigenMS                                                                                                                                              | Karpievitch, Yuliya V | 43  | 10.1371/journal.pone.0116221 |
|                     |    |         | Sample preparation and orthogonal chromatography for broad polarity range plasma metabolomics: Application to human subjects with neurodegenerative dementia                              | Armirotti, Andrea     | 24  | 10.1016/j.ab.2014.03.019     |
|                     |    |         | Training in metabolomics research. II. Processing and statistical analysis of metabolomics data, metabolite identification, pathway analysis, applications of metabolomics and its future | Barnes, Stephen       | 21  | 0.1002/jms.3780              |
|                     |    |         | Analysis of serum phospholipid profiles by liquid chromatography-tandem mass spectrometry in high resolution mode for evaluation of atherosclerotic patients                              | Calderon-Santiago, M  | 15  | 10.1016/j.chroma.2014.10.052 |
|                     | 8  | pathway | Metabolomics Workbench: An international repository for metabolomics data and metadata, metabolite standards, protocols, tutorials and training, and analysis tools                       | Sud, Manish           | 175 | 10.1093/nar/gkv1042          |
|                     |    |         | Diagnosis of major depressive disorder based on changes in multiple plasma neurotransmitters: a targeted metabolomics study                                                               | Pan, Jun-Xi           | 31  | 10.1038/s41398-018-0183-x    |
|                     |    |         | Response of Gut Microbiota to Metabolite Changes Induced by Endurance Exercise                                                                                                            | Zhao, Xia             | 26  | 10.3389/fmicb.2018.00765     |



|   |                 |                                                                                                                                                                                           |                          |     |                                  |
|---|-----------------|-------------------------------------------------------------------------------------------------------------------------------------------------------------------------------------------|--------------------------|-----|----------------------------------|
|   |                 | Training in metabolomics research. II. Processing and statistical analysis of metabolomics data, metabolite identification, pathway analysis, applications of metabolomics and its future | Barnes, Stephen          | 21  | 10.1002/jms.3780                 |
|   |                 | Metabolomics analysis of serum reveals the effect of Danggui Buxue Tang on fatigued mice induced by exhausting physical exercise                                                          | Miao, Xiaoyao            | 12  | 10.1016/j.jpba.2018.01.028       |
| 8 | survival        | The ColoCare Study: A Paradigm of Transdisciplinary Science in Colorectal Cancer Outcomes                                                                                                 | Ulrich, Cornelia M       | 15  | 10.1158/1055-9965.EPI-18-0773    |
|   |                 | Associations of branched-chain amino acids with parameters of energy balance and survival in colorectal cancer patients: results from the ColoCare study                                  | Delphan, Mahmoud         | 9   | 10.1007/s11306-017-1314-8        |
|   |                 | Identification of metabolites in plasma for predicting survival in glioblastoma                                                                                                           | Shen, Jie                | 6   | 10.1002/mc.22815                 |
|   |                 | LC-MS-based serum fingerprinting reveals significant dysregulation of phospholipids in chronic heart failure                                                                              | Marcinkiewicz-Siemion, M | 5   | 10.1016/j.jpba.2018.03.027       |
|   |                 | A distinct glycerophospholipid metabolism signature of acute graft versus host disease with predictive value                                                                              | Liu, Yue                 | 3   | 10.1172/jci.insight.129494       |
| 7 | body mass index | Metabolic Signatures of Adiposity in Young Adults: Mendelian Randomization Analysis and Effects of Weight Change                                                                          | Wurtz, Peter             | 135 | 10.1371/journal.pmed.1001765     |
|   |                 | Associations of Body Mass and Fat Indexes With Cardiometabolic Traits                                                                                                                     | Bell, Joshua A           | 19  | 10.1016/j.jacc.2018.09.066       |
|   |                 | Day-3 embryo metabolomics in the spent culture media is altered in obese women undergoing in vitro fertilization                                                                          | Bellver, Jose            | 18  | 10.1016/j.fertnstert.2015.03.015 |
|   |                 | Personalized nutrition and obesity                                                                                                                                                        | Qi, Lu                   | 16  | 10.3109/07853890.2014.891802     |
|   |                 | Associations of branched-chain amino acids with parameters of energy balance and survival in colorectal cancer patients: results from the ColoCare study                                  | Delphan, Mahmoud         | 9   | 10.1007/s11306-017-1314-8        |

|     |            |                                                                                                                                                                         |                      |     |                                   |
|-----|------------|-------------------------------------------------------------------------------------------------------------------------------------------------------------------------|----------------------|-----|-----------------------------------|
| 5   | proteomics | Sportomics: Building a new concept in metabolic studies and exercise science                                                                                            | Bassini, Adriana     | 22  | 10.1016/j.bbrc.2013.12.137        |
|     |            | MASSyPup - an 'Out of the Box' solution for the analysis of mass spectrometry data                                                                                      | Winkler, Robert      | 15  | 10.1002/jms.3314                  |
|     |            | Rational and design of an overfeeding protocol in constitutional thinness: Understanding the physiology, metabolism and genetic background of resistance to weight gain | Ling, Yiin           | 8   | 10.1016/j.ando.2016.06.001        |
|     |            | Bridging the Gaps: The Promise of Omics Studies in Pediatric Exercise Research                                                                                          | Radom-Aizik, Shlomit | 4   | 10.1123/pes.2015-0270             |
|     |            | Childhood obesity: a systems medicine approach                                                                                                                          | Stone, William L     | 2   | 10.2741/4441                      |
| 197 | exercise   | Investigations of the effects of gender, diurnal variation, and age in human urinary metabolomic profiles                                                               | Slupsky, Carolyn M   | 283 | 10.1021/ac0708588                 |
|     |            | Circulating branched-chain amino acid concentrations are associated with obesity and future insulin resistance in children and adolescents                              | McCormack, S E       | 209 | 10.1111/j.2047-6310.2012.00087.x  |
|     |            | Long-term Leisure-time Physical Activity and Serum Metabolome                                                                                                           | Kujala, Urho M       | 109 | 10.1161/CIRCULATIONAHA.112.105551 |
|     |            | Metabolomic profiling of dietary-induced insulin resistance in the high fat-fed C57BL/6J mouse                                                                          | Shearer, J           | 94  | 10.1111/j.1463-1326.2007.00837.x  |
|     |            | A multivariate screening strategy for investigating metabolic effects of strenuous physical exercise in human serum                                                     | Pohjanen, Elin       | 85  | 10.1021/pr070007g                 |
|     |            | Quantitative Serum Nuclear Magnetic Resonance Metabolomics in Cardiovascular Epidemiology and                                                                           | Soininen, Pasi       | 227 | 10.1161/CIRCGENETICS.114.000216   |
|     |            | Targeted metabolomics for discrimination of systemic inflammatory disorders in critically ill patients                                                                  | Schmerler, Diana     | 78  | 10.1194/jlr.P023309               |

|  |    |                 |                                                                                                                                                                                                                                                          |                     |     |                                     |
|--|----|-----------------|----------------------------------------------------------------------------------------------------------------------------------------------------------------------------------------------------------------------------------------------------------|---------------------|-----|-------------------------------------|
|  | 86 | metabolism      | Mass Spectrometry-Based Quantitative Metabolomics Revealed a Distinct Lipid Profile in Breast Cancer Patients                                                                                                                                            | Qiu, Yunping        | 57  | 10.3390/ijms14048047                |
|  |    |                 | Prognostic Implications of Long-Chain Acylcarnitines in Heart Failure and Reversibility With Mechanical Circulatory Support                                                                                                                              | Ahmad, Tariq        | 57  | 10.1016/j.jacc.2015.10.079          |
|  |    |                 | Metabolomic Profiling Identifies Novel Circulating Biomarkers of Mitochondrial Dysfunction Differentially Elevated in Heart Failure With Preserved Versus Reduced Ejection Fraction: Evidence for Shared Metabolic Impairments in Clinical Heart Failure | Hunter, Wynn G      | 52  | 10.1161/JAHA.115.003190             |
|  | 86 | skeletal muscle | Energy Metabolic Reprogramming in the Hypertrophied and Early Stage Failing Heart A Multisystems Approach                                                                                                                                                | Lai, Ling           | 109 | 10.1161/CIRCHEARTFAILURE.114.001469 |
|  |    |                 | Medium Chain Acylcarnitines Dominate the Metabolite Pattern in Humans under Moderate Intensity Exercise and Support Lipid Oxidation                                                                                                                      | Lehmann, Rainer     | 81  | 10.1371/journal.pone.0011519        |
|  |    |                 | Muscle-specific loss of Bmal1 leads to disrupted tissue glucose metabolism and systemic glucose homeostasis                                                                                                                                              | Harfmann, Brianna D | 70  | 10.1186/s13395-016-0082-x           |
|  |    |                 | Metabolite signatures of exercise training in human skeletal muscle relate to mitochondrial remodelling and cardiometabolic fitness                                                                                                                      | Huffman, Kim M      | 53  | 10.1007/s00125-014-3343-4           |
|  |    |                 | Six weeks of a polarized training-intensity distribution leads to greater physiological and performance adaptations than a threshold model in trained cyclists                                                                                           | Neal, Craig M       | 52  | 10.1152/japplphysiol.00652.2012     |
|  |    |                 | Metabolic and hormonal responses to isoenergetic high-intensity interval exercise and continuous moderate-intensity exercise                                                                                                                             | Peake, Jonathan M   | 70  | 10.1152/ajpendo.00276.2014          |
|  |    |                 |                                                                                                                                                                                                                                                          |                     |     |                                     |

|                          |    |            |                                                                                                                                                                    |                      |     |                                     |
|--------------------------|----|------------|--------------------------------------------------------------------------------------------------------------------------------------------------------------------|----------------------|-----|-------------------------------------|
| #4<br>skeletal<br>muscle | 18 | glucose    | Impact of combined resistance and aerobic exercise training on branched-chain amino acid turnover, glycine metabolism and insulin sensitivity in overweight humans | Glynn, Erin L        | 50  | 10.1007/s00125-015-3705-6           |
|                          |    |            | Serum metabolic profiles in overweight and obese women with and without metabolic syndrome                                                                         | Wiklund, Petri K     | 42  | 10.1186/1758-5996-6-40              |
|                          |    |            | Metabolomics Approach for Analyzing the Effects of Exercise in Subjects with Type 1 Diabetes Mellitus                                                              | Brugnara, Laura      | 41  | 10.1371/journal.pone.0040600        |
|                          |    |            | A Protein-Leucine Supplement Increases Branched-Chain Amino Acid and Nitrogen Turnover But Not Performance                                                         | Nelson, Andre R      | 31  | 10.1249/MSS.0b013e3182290371        |
|                          | 15 | validation | Identification of novel candidate plasma metabolite biomarkers for distinguishing serous ovarian carcinoma and benign serous ovarian tumors                        | Buas, Matthew F      | 29  | 10.1016/j.ygyno.2015.10.021         |
|                          |    |            | The Cooperative Health Research in South Tyrol (CHRIS) study: rationale, objectives, and preliminary results                                                       | Pattaro, Cristian    | 22  | 10.1186/s12967-015-0704-9           |
|                          |    |            | Metabolite signature for diagnosing major depressive disorder in peripheral blood mononuclear cells                                                                | Zheng, Peng          | 19  | 10.1016/j.jad.2016.02.008           |
|                          |    |            | Global profiling of the muscle metabolome: method optimization, validation and application to determine exercise-induced metabolic effects                         | Alves, Rodrigo D A M | 10  | 10.1007/s11306-014-0701-7           |
|                          |    |            | Metabolic profiling identifies phospholipids as potential serum biomarkers for schizophrenia                                                                       | Wang, Dongfang       | 10  | 10.1016/j.psychres.2018.12.008      |
|                          |    |            | Energy Metabolic Reprogramming in the Hypertrophied and Early Stage Failing Heart A Multisystems Approach                                                          | Lai, Ling            | 109 | 10.1161/CIRCHEARTFAILURE.114.001469 |

|  |    |                 |                                                                                                                                                                          |                        |    |                                 |
|--|----|-----------------|--------------------------------------------------------------------------------------------------------------------------------------------------------------------------|------------------------|----|---------------------------------|
|  | 14 | gene expression | Predictive Metabolomics Evaluation of Nutrition-Modulated Metabolic Stress Responses in Human Blood Serum During the Early Recovery Phase of Strenuous Physical Exercise | Chorell, Ellin         | 78 | 10.1021/pr900081q               |
|  |    |                 | Molecular alterations in skeletal muscle in rheumatoid arthritis are related to disease activity, physical inactivity, and disability                                    | Huffman, Kim M         | 28 | 10.1186/s13075-016-1215-7       |
|  |    |                 | GC-MS based metabolomics identification of possible novel biomarkers for schizophrenia in peripheral blood mononuclear cells                                             | Liu, Mei-Ling          | 28 | 10.1039/c4mb00157e              |
|  |    |                 | Whole Blood Transcriptomics and Urinary Metabolomics to Define Adaptive Biochemical Pathways of High-Intensity Exercise in 50-60 Year Old Masters Athletes               | Mukherjee, Kamalika    | 25 | 10.1371/journal.pone.0092031    |
|  | 11 | database        | Large-Scale Prediction of Collision Cross-Section Values for Metabolites in Ion Mobility-Mass Spectrometry                                                               | Zhou, Zhiwei           | 70 | 10.1021/acs.analchem.6b03091    |
|  |    |                 | Fast metabolite identification with Input Output Kernel Regression                                                                                                       | Brouard, Celine        | 28 | 10.1093/bioinformatics/btw246   |
|  |    |                 | Whole-body fat oxidation increases more by prior exercise than overnight fasting in elite endurance athletes                                                             | Hall, Ulrika Andersson | 15 | 10.1139/apnm-2015-0452          |
|  |    |                 | Development and Validation of a High-Throughput Mass Spectrometry Based Urine Metabolomic Test for the Detection of Colonic Adenomatous Polyps                           | Deng, Lu               | 13 | 10.3390/metabo7030032           |
|  |    |                 | Liquid Chromatography-Mass Spectrometry-Based Metabolomics of Nonhuman Primates after 4 Gy Total Body Radiation Exposure: Global Effects and Targeted Panels             | Pannkuk, Evan L        | 9  | 10.1021/acs.jproteome.9b00101   |
|  |    |                 | Six weeks of a polarized training-intensity distribution leads to greater physiological and performance adaptations than a threshold model in trained cyclists           | Neal, Craig M          | 52 | 10.1152/japplphysiol.00652.2012 |

|  |   |           |                                                                                                                                                                |                     |    |                                 |
|--|---|-----------|----------------------------------------------------------------------------------------------------------------------------------------------------------------|---------------------|----|---------------------------------|
|  | 9 | capacity  | Metabolomics Approach for Analyzing the Effects of Exercise in Subjects with Type 1 Diabetes Mellitus                                                          | Brugnara, Laura     | 41 | 10.1371/journal.pone.0040600    |
|  |   |           | Effects of a Flavonoid-Rich Juice on Inflammation, Oxidative Stress, and Immunity in Elite Swimmers: A Metabolomics-Based Approach                             | Knab, Amy M         | 32 | 10.1123/ijsnem.23.2.150         |
|  |   |           | Plasma metabolic profile in COPD patients: effects of exercise and                                                                                             | Rodriguez, Diego A  | 21 | 10.1007/s11306-011-0336-x       |
|  |   |           | Reduced mitochondrial lipid oxidation leads to fat accumulation in myosteatosis                                                                                | Gumucio, Jonathan P | 15 | 10.1096/fj.201802457RR          |
|  | 7 | oxidation | Six weeks of a polarized training-intensity distribution leads to greater physiological and performance adaptations than a threshold model in trained cyclists | Neal, Craig M       | 52 | 10.1152/japplphysiol.00652.2012 |
|  |   |           | Type 2 diabetes alters metabolic and transcriptional signatures of glucose and amino acid metabolism during exercise and recovery                              | Hansen, Jakob S     | 43 | 10.1007/s00125-015-3584-x       |
|  |   |           | The relationship between aerobic fitness level and metabolic profiles in healthy adults                                                                        | Morris, Ciara       | 35 | 10.1002/mnfr.201200629          |
|  |   |           | Metabolic modeling of muscle metabolism identifies key reactions linked to insulin resistance phenotypes                                                       | Nogiec, Christopher | 18 | 10.1016/j.molmet.2014.12.012    |
|  |   |           | Metabolomics studies on db/db diabetic mice in skeletal muscle reveal effective clearance of overloaded intermediates by exercise                              | Xiang, Li           | 14 | 10.1016/j.aca.2017.11.082       |
|  | 6 | gene      | Untargeted 1H-NMR metabolomics in CSF                                                                                                                          | Blasco, Helene      | 29 | 10.1212/WNL.0000000000000274    |
|  |   |           | Estrogen-Related Receptor- $\alpha$ Coordinates Transcriptional Programs Essential for Exercise Tolerance and Muscle Fitness                                   | Perry, Marie-Claude | 21 | 10.1210/me.2014-1281            |
|  |   |           | Metabolomics biomarkers to predict acamprosate treatment response in alcohol-dependent subjects                                                                | Hinton, David J     | 11 | 10.1038/s41598-017-02442-4      |

|  |    |            |                                                                                                                                                                                          |                          |    |                               |
|--|----|------------|------------------------------------------------------------------------------------------------------------------------------------------------------------------------------------------|--------------------------|----|-------------------------------|
|  |    |            | A mutation in Ampd2 is associated with nephrotic syndrome and hypercholesterolemia in mice                                                                                               | Helmering, Joan          | 10 | 10.1186/1476-511X-13-167      |
|  |    |            | MetaComp: comprehensive analysis software for comparative meta-omics including comparative metagenomics                                                                                  | Zhai, Peng               | 8  | 10.1186/s12859-017-1849-8     |
|  | 56 | metabolite | Metabolic and hormonal responses to isoenergetic high-intensity interval exercise and continuous moderate-intensity exercise                                                             | Peake, Jonathan M        | 70 | 10.1152/ajpendo.00276.2014    |
|  |    |            | Identifying biomarkers of dietary patterns by using metabolomics                                                                                                                         | Playdon, Mary C          | 62 | 10.3945/ajcn.116.144501       |
|  |    |            | Comparing metabolite profiles of habitual diet in serum and urine                                                                                                                        | Playdon, Mary C          | 59 | 10.3945/ajcn.116.135301       |
|  |    |            | Influence of a Polyphenol-Enriched Protein Powder on Exercise-Induced Inflammation and Oxidative Stress in Athletes: A Randomized Trial Using a Metabolomics Approach                    | Nieman, David C          | 54 | 10.1371/journal.pone.0072215  |
|  |    |            | Metabolomics Study of Urine in Autism Spectrum Disorders Using a Multiplatform Analytical Methodology                                                                                    | Dieme, Binta             | 50 | 10.1021/acs.jproteome.5b00699 |
|  | 18 | rat        | Monitoring the Response of the Human Urinary Metabolome to Brief Maximal Exercise by a Combination of RP-UPLC-MS and H-1 NMR Spectroscopy                                                | Pechlivanis , Alexandros | 24 | 10.1021/acs.jproteome.5b00470 |
|  |    |            | Effects of Acute Systematic Hypoxia on Human Urinary Metabolites Using LC-MS-Based Metabolomics                                                                                          | Lou, Bih-Show            | 19 | 10.1089/ham.2013.1130         |
|  |    |            | Beneficial effects of exercise on gut microbiota functionality and barrier integrity, and gut-liver crosstalk in an in vivo model of early obesity and non-alcoholic fatty liver disease | Carbajo-Pescador, Sara   | 16 | 10.1242/dmm.039206            |
|  |    |            | Molecular and metabolomic effects of voluntary running wheel activity on skeletal muscle in late middle-aged rats                                                                        | Garvey, Sean M           | 15 | 10.14814/phy2.12319           |

|    |            |                                                                                                                                        |                           |    |                               |
|----|------------|----------------------------------------------------------------------------------------------------------------------------------------|---------------------------|----|-------------------------------|
|    |            | Metabolomics analysis of serum reveals the effect of Danggui Buxue Tang on fatigued mice induced by exhausting physical exercise       | Miao, Xiaoyao             | 12 | 10.1016/j.jpba.2018.01.028    |
| 17 | blood      | Metabolic time-course response after resistance exercise: A metabolomics approach                                                      | Berton, Ricardo           | 22 | 10.1080/02640414.2016.1218035 |
|    |            | Individual Human Metabolic Phenotype Analyzed by H-1 NMR of Saliva Samples                                                             | Wallner-Liebniann, Sandra | 18 | 10.1021/acs.jproteome.5b01060 |
|    |            | Human Genetic Variation, Sport and Exercise Medicine, and Achilles Tendinopathy: Role for Angiogenesis-Associated Genes                | Rahim, Masouda            | 14 | 10.1089/omi.2016.0116         |
|    |            | Targeted Metabolomics Approach To Detect the Misuse of Steroidal Aromatase Inhibitors in Equine Sports by Biomarker Profiling          | Chan, George Ho Man       | 11 | 10.1021/acs.analchem.5b03165  |
|    |            | A plasma metabolite panel as biomarkers for early primary breast cancer detection                                                      | Yuan, Baowen              | 9  | 10.1002/ijc.31996             |
| 17 | prediction | Metabolomics insights into early type 2 diabetes pathogenesis and detection in individuals with normal fasting glucose                 | Merino, Jordi             | 31 | 10.1007/s00125-018-4599-x     |
|    |            | Fast metabolite identification with Input Output Kernel Regression                                                                     | Brouard, Celine           | 28 | 10.1093/bioinformatics/btw246 |
|    |            | Maternal urinary metabolic signatures of fetal growth and associated clinical and environmental factors in the INMA study              | Maitre, Lea               | 25 | 10.1186/s12916-016-0706-3     |
|    |            | Efficiency of genomic selection for tomato fruit quality                                                                               | Duangjit, Janejira        | 23 | 10.1007/s11032-016-0453-3     |
|    |            | A Pharmacometabonomic Approach To Predicting Metabolic Phenotypes and Pharmacokinetic Parameters of Atorvastatin in Healthy Volunteers | Huang, Qing               | 21 | 10.1021/acs.jproteome.5b00440 |
|    |            | Investigation of Gender-Specific Exhaled Breath Volatome in Humans by GCxGC-TOF-MS                                                     | Das, Mrinal Kumar         | 39 | 10.1021/ac403541a             |



|          |    |                |                                                                                                                                                                                                                                                      |                     |    |                              |
|----------|----|----------------|------------------------------------------------------------------------------------------------------------------------------------------------------------------------------------------------------------------------------------------------------|---------------------|----|------------------------------|
| #5 aging | 16 | age            | NMR-Based Metabolomic Profiling of Overweight Adolescents: An Elucidation of the Effects of Inter-/Intraindividual Differences, Gender, and Pubertal Development                                                                                     | Zheng, Hong         | 23 | 10.1155/2014/537157          |
|          |    |                | The Intersection of Aging Biology and the Pathobiology of Lung Diseases: A Joint NHLBI/NIA Workshop                                                                                                                                                  | Budinger, G R Scott | 22 | 10.1093/gerona/glx090        |
|          |    |                | Phthalate exposure and childhood overweight and obesity: Urinary metabolomic evidence                                                                                                                                                                | Xia, Bin            | 14 | 10.1016/j.envint.2018.09.001 |
|          |    |                | Characterization of trotter horses urine metabolome by means of proton nuclear magnetic resonance spectroscopy                                                                                                                                       | Zhu, Chenglin       | 11 | 10.1007/s11306-018-1403-3    |
|          | 13 | gut microbiota | Changes in intestinal microbiota composition and metabolism coincide with increased intestinal permeability in young adults under prolonged physiological stress                                                                                     | Karl, J Philip      | 77 | 10.1152/ajpgi.00066.2017     |
|          |    |                | Response of Gut Microbiota to Metabolite Changes Induced by Endurance Exercise                                                                                                                                                                       | Zhao, Xia           | 26 | 10.3389/fmicb.2018.00765     |
|          |    |                | Urinary biomarker panel for diagnosing patients with depression and anxiety disorders                                                                                                                                                                | Chen, Jian-jun      | 23 | 10.1038/s41398-018-0245-0    |
|          |    |                | Effect of aerobic exercise and low carbohydrate diet on pre-diabetic non-alcoholic fatty liver disease in postmenopausal women and middle aged men - the role of gut microbiota composition: study protocol for the AELC randomized controlled trial | Liu, Wu Yi          | 19 | 10.1186/1471-2458-14-48      |
|          |    |                | Intestinal Metagenomes and Metabolomes in Healthy Young Males: Inactivity and Hypoxia Generated Negative Physiological Symptoms Precede Microbial Dysbiosis                                                                                          | Sket, Robert        | 11 | 10.3389/fphys.2018.00198     |

|    |           |                                                                                                                                                                                |                          |    |                            |
|----|-----------|--------------------------------------------------------------------------------------------------------------------------------------------------------------------------------|--------------------------|----|----------------------------|
| 12 | aging     | The effects of graded levels of calorie restriction: IX. Global metabolomic screen reveals modulation of carnitines, sphingolipids and bile acids in the liver of C57BL/6 mice | Green, Cara L            | 21 | 10.1111/accel.12570        |
|    |           | Improved motor and cognitive performance with sodium nitrite supplementation is related to small metabolite signatures: a pilot trial in middle-aged and older adults          | Justice, Jamie N         | 19 | 10.18632/aging.100842      |
|    |           | Molecular and metabolomic effects of voluntary running wheel activity on skeletal muscle in late middle-aged rats                                                              | Garvey, Sean M           | 15 | 10.14814/phy2.12319        |
|    |           | Impact of exercise on fecal and cecal metabolome over aging: a longitudinal study in rats                                                                                      | Deda, Olga               | 11 | 10.4155/bio-2016-0222      |
|    |           | Impact of Exercise and Aging on Rat Urine and Blood Metabolome. An LC-MS Based Metabolomics Longitudinal Study                                                                 | Deda, Olga               | 7  | 10.3390/metabo7010010      |
| 8  | carnitine | Metabolomics studies on db/db diabetic mice in skeletal muscle reveal effective clearance of overloaded intermediates by exercise                                              | Xiang, Li                | 14 | 10.1016/j.aca.2017.11.082  |
|    |           | Circulating Metabolites Associated with Alcohol Intake in the European Prospective Investigation into Cancer and Nutrition Cohort                                              | van Roekel, Eline H      | 6  | 10.3390/nu10050654         |
|    |           | LC-MS-based serum fingerprinting reveals significant dysregulation of phospholipids in chronic heart failure                                                                   | Marcinkiewicz-Siemion, M | 5  | 10.1016/j.jpba.2018.03.027 |
|    |           | Metabolomic Response to Acute Hypoxic Exercise and Recovery in Adult Males                                                                                                     | Davison, Gareth          | 4  | 10.3389/fphys.2018.01682   |
|    |           | An NMR-Based Approach to Identify Urinary Metabolites Associated with Acute Physical Exercise and Cardiorespiratory Fitness in Healthy Humans-Results of the KarMeN Study      | Kistner, Sina            | 0  | 10.3390/metabo10050212     |

|  |   |                       |                                                                                                                                                                             |                         |     |                               |
|--|---|-----------------------|-----------------------------------------------------------------------------------------------------------------------------------------------------------------------------|-------------------------|-----|-------------------------------|
|  | 7 | lipidomics            | Modulation of the lipidomic profile due to a lipid challenge and fitness level: a postprandial study                                                                        | Morris, Ciara           | 7   | 10.1186/s12944-015-0062-x     |
|  |   |                       | Comparative determination of fatty acid composition of low-molecular components of blood plasma by three mass spectrometry techniques: the 'old-new' exercise in lipidomics | Milman, B L             | 2   | 10.1134/S1061934815140099     |
|  |   |                       | Physical activity and lipidomics in a population at high risk of type 2 diabetes mellitus                                                                                   | Henson, Joseph          | 1   | 10.1080/02640414.2020.1744836 |
|  |   |                       | Plasma Metabolomics Profiles are Associated with the Amount and Source of Protein Intake: A Metabolomics Approach within the PREDIMED Study                                 | Hernandez-Alonso, Pablo | 0   | 10.1002/mnfr.202000178        |
|  |   |                       | Comprehensive Metabolomic and Lipidomic Analysis Reveals Metabolic Changes After Mindfulness Training                                                                       | Chen, Wei               | 0   | 10.1007/s12671-020-01359-w    |
|  | 6 | targeted metabolomics | Harmonizing lipidomics: NIST                                                                                                                                                | Bowden,                 | 120 | 10.1194/jlr.M079012           |
|  |   |                       | Food Targeting: Geographical Origin Determination of Hazelnuts (Corylus avellana) by LC-QqQ-MS/MS-Based Targeted Metabolomics Application                                   | Klockmann, Sven         | 24  | 10.1021/acs.jafc.6b05007      |
|  |   |                       | Identification of metabolic pathway disturbances using multimodal metabolomics in autistic disorders in a Middle Eastern population                                         | Bitar, Tania            | 18  | 10.1016/j.jpba.2018.01.007    |
|  |   |                       | Impact of Exercise and Aging on Rat Urine and Blood Metabolome. An LC-MS Based Metabolomics Longitudinal Study                                                              | Deda, Olga              | 7   | 10.3390/metabo7010010         |
|  |   |                       | Circulating Metabolites Associated with Alcohol Intake in the European Prospective Investigation into Cancer and Nutrition Cohort                                           | van Roekel, Eline H     | 6   | 10.3390/nu10050654            |
