# Supplementary material for: Research in the Field of Exercise and Metabolomics: A Bibliometric and Visual Analysis
Source: MDPI journal article supplement (doi:10.3390/metabo12060542), 2022-06-14
Supplement: s1 [file s1]

Supplementary Table S2. Top 20 authors distributed by publications in the field of exercise and metabolomics

| Rank | First publication year | Author            | publications | Institution                                                                                                                                                                                                                                                       |
|------|------------------------|-------------------|--------------|-------------------------------------------------------------------------------------------------------------------------------------------------------------------------------------------------------------------------------------------------------------------|
| 1    | 2013                   | PENG ZHENG        | 10           | 1.Department of Neurology, The First Affiliated Hospital of Chongqing Medical University.<br>2.Institute of Neuroscience and the Collaborative Innovation Center for Brain Science, Chongqing Medical University.<br>3. Chongqing Key Laboratory of Neurobiology. |
| 2    | 2013                   | PENG XIE          | 10           | 1.Department of Neurology, The First Affiliated Hospital of Chongqing Medical University.<br>2.Institute of Neuroscience and the Collaborative Innovation Center for Brain Science, Chongqing Medical University.<br>3. Chongqing Key Laboratory of Neurobiology. |
| 3    | 2015                   | HANS J VOGEL      | 8            | 1.North Carolina Research Campus, Appalachian State University.                                                                                                                                                                                                   |
| 4    | 2017                   | CLARY B CLISH     | 8            | 1.Broad Institute of MIT and Harvard University Cambridge.                                                                                                                                                                                                        |
| 5    | 2013                   | DAVID C NIEMAN    | 8            | 1.Human Performance Laboratory, Appalachian State University.                                                                                                                                                                                                     |
| 6    | 2014                   | OLIVER FIEHN      | 8            | 1.West Coast Metabolomics Center, University of California.<br>2.Biochemistry Department, King Abdulaziz University.                                                                                                                                              |
| 7    | 2019                   | LIMING LIANG      | 5            | 1.Department of Epidemiology, Harvard T.H. Chan School of Public Health.<br>2.Department of Biostatistics, Harvard T.H. Chan School of Public Health.                                                                                                             |
| 8    | 2016                   | JOSHUA N SAMPSON  | 5            | 1.Division of Cancer Epidemiology and Genetics, National Cancer Institute, NIH, Department of Health and Human Services.                                                                                                                                          |
| 9    | 2018                   | ROBERT E GERSZTEN | 5            | 1.Beth Israel Deaconess Medical Center, Harvard Medical School.                                                                                                                                                                                                   |
| 10   | 2018                   | KARSTEN SUHRE     | 5            | 1.Weill Cornell Medicine- Qatar.                                                                                                                                                                                                                                  |
| 11   | 2013                   | R ANDREW SHANELY  | 5            | 1.Appalachian State University, Human Performance Lab, North Carolina Research Campus                                                                                                                                                                             |

|    |      |                              |   |                                                                                                                                                                                                                                                                                                                                                                                                                   |
|----|------|------------------------------|---|-------------------------------------------------------------------------------------------------------------------------------------------------------------------------------------------------------------------------------------------------------------------------------------------------------------------------------------------------------------------------------------------------------------------|
| 12 | 2019 | JOANN E<br>MANSON            | 5 | 1.Division of Preventive Medicine, Department of Medicine, Brigham and Women' s Hospital.<br>2.Harvard Medical School, Boston, MA, USA; 3Department of Biostatistics and Epidemiology, School of Public Health and Health Sciences, University of Massachusetts.<br>3.Department of Nutrition, Harvard TH Chan School of Public Health.<br>4.Department of Epidemiology, Harvard TH Chan School of Public Health. |
| 13 | 2018 | FRANCESCO<br>DONATI          | 4 | 1.Laboratorio Antidoping, Federazione Medico Sportiva Italiana.                                                                                                                                                                                                                                                                                                                                                   |
| 14 | 2014 | RICHARD<br>WILSON            | 4 | 1.Central Science Laboratory, University of Tasmania.                                                                                                                                                                                                                                                                                                                                                             |
| 15 | 2016 | STEVEN C<br>MOORE            | 4 | 1.Nutritional Epidemiology Branch, Division of Cancer Epidemiology and Genetics, National Cancer Institute, National Institutes of Health.<br>1.Division of Preventive Medicine, Department of Medicine, Brigham and Women' s Hospital.                                                                                                                                                                           |
| 16 | 2019 | KATHRYN M<br>REXRODE         | 4 | 2.Harvard Medical School, Boston, MA, USA; 3Department of Biostatistics and Epidemiology, School of Public Health and Health Sciences, University of Massachusetts.<br>3.Division of Women' s Health, Department of Medicine, Brigham and Women' s Hospital.                                                                                                                                                      |
| 17 | 2018 | COSTAS<br>GEORGAKOPOU<br>LOS | 4 | 1.Anti Doping Laboratory Qatar, Sports City.                                                                                                                                                                                                                                                                                                                                                                      |
| 18 | 2017 | LAURENCE LE<br>MOYEC         | 4 | 1. UBIAE EA 7362, Université Evry, Université Paris-Saclay.                                                                                                                                                                                                                                                                                                                                                       |
| 19 | 2015 | WILLIAM E<br>KRAUS           | 4 | 1.Duke University.                                                                                                                                                                                                                                                                                                                                                                                                |
| 20 | 2013 | YING WANG                    | 4 | 1.Department of Neurology, The First Affiliated Hospital of Chongqing Medical University.<br>2.Institute of Neuroscience and the Collaborative Innovation Center for Brain Science, Chongqing Medical University.<br>3. Chongqing Key Laboratory of Neurobiology.                                                                                                                                                 |

---
