# Supplementary material for: Research in the Field of Exercise and Metabolomics: A Bibliometric and Visual Analysis
Source: MDPI journal article supplement (doi:10.3390/metabo12060542), 2022-06-14
Supplement: s1 [file s1]

Supplementary Table S3. Top 20 authors distributed by citations in the field of exercise and metabolomics

| Rank | First cited year | Cited author | Cited frequency | Institution                                                                                                                                                                                                                                                                                                                                                          |
|------|------------------|--------------|-----------------|----------------------------------------------------------------------------------------------------------------------------------------------------------------------------------------------------------------------------------------------------------------------------------------------------------------------------------------------------------------------|
| 1    | 2007             | Nicholson JK | 115             | 1.Australian National Phenome Centre, Health Futures Institute, Murdoch University.<br>2.Center for Computational and Systems Medicine, Health Futures Institute, Murdoch University.                                                                                                                                                                                |
| 2    | 2009             | Wishart DS   | 100             | 1.Department of Biological Sciences, University of Alberta.                                                                                                                                                                                                                                                                                                          |
| 3    | 2010             | Lewis GD     | 81              | 1.Cardiology Division of Massachusetts General Hospital                                                                                                                                                                                                                                                                                                              |
| 4    | 2014             | Xia JG       | 71              | 1.Institute of Parasitology, McGill University.<br>2.Department of Human Genetics, McGill University.<br>3.Department of Animal Science, McGill University.                                                                                                                                                                                                          |
| 5    | 2014             | BENJAMINI Y  | 69              | 1.Sagol School of Neuroscience, Tel-Aviv University.<br>2.Department of Statistics and Operations Research, Tel-Aviv University.                                                                                                                                                                                                                                     |
| 6    | 2013             | Wang TJ      | 64              | 1.Division of Cardiovascular Medicine, Vanderbilt University Medical Center.                                                                                                                                                                                                                                                                                         |
| 7    | 2013             | Newgard CB   | 62              | 1.Sarah W. Stedman Nutrition and Metabolism Center, Duke University Medical Center.<br>2.Duke Molecular Physiology Institute, Duke University Medical Center.<br>3.Department of Pharmacology & Cancer Biology, Duke University Medical Center.<br>4.Department of Medicine, Divisions of Endocrinology & Metabolism and Cardiology, Duke University Medical Center. |
| 8    | 2005             | Fiehn O      | 50              | 1.West Coast Metabolomics Center, University of California.                                                                                                                                                                                                                                                                                                          |

|    |      |               |    |                                                                                                                                                                                                                                                                                                           |
|----|------|---------------|----|-----------------------------------------------------------------------------------------------------------------------------------------------------------------------------------------------------------------------------------------------------------------------------------------------------------|
| 9  | 2006 | Dunn WB       | 48 | <p>1. Manchester Centre for Integrative Systems Biology, University of Manchester.</p> <p>2. Department of Chemistry, Manchester Interdisciplinary Biocentre, University of Manchester.</p> <p>3. Centre for Advanced Discovery and Experimental Therapeutics, Manchester Biomedical Research Centre.</p> |
| 10 | 2012 | Pechlivanis A | 46 | <p>1. Department of Chemistry, Aristotle University of Thessalonik.</p>                                                                                                                                                                                                                                   |
| 11 | 2014 | Smith CA      | 43 | <p>1. Hall-Atwater Laboratories, Wesleyan University.</p> <p>2. Department for Theoretical and Computational Biophysics, Max Planck Institute for Biophysical Chemistry.</p>                                                                                                                              |
| 12 | 2006 | Trygg J       | 39 | <p>1. Sartorius Corporate Research.</p> <p>2. Computational Life Science Cluster (CLiC), Umeå University.</p>                                                                                                                                                                                             |
| 13 | 2013 | Nieman DC     | 38 | <p>1. Appalachian State University</p>                                                                                                                                                                                                                                                                    |
| 14 | 2009 | Chorell E     | 36 | <p>1. Department of Public Health and Clinical Medicine, Umeå University.</p>                                                                                                                                                                                                                             |
| 15 | 2013 | Floegel A     | 36 | <p>1. Department of Epidemiology, German Institute of Human Nutrition Potsdam-Bornheim</p>                                                                                                                                                                                                                |
| 16 | 2007 | Holmes E      | 35 | <p>1. Australian National Phenome Centre, Health Futures Institute, Murdoch University.</p> <p>2. Center for Computational and Systems Medicine, Health Futures Institute, Murdoch University.</p> <p>3. Section for Nutrition Research, Imperial College London.</p>                                     |
| 17 | 2009 | Yan B         | 35 | <p>1. School of Environmental Science and Engineering, Tianjin University.</p> <p>2. Key Laboratory of Biomass-based Oil and Gas (Tianjin University), China Petroleum and Chemical Industry Federation.</p>                                                                                              |
| 18 | 2013 | Huffman KM    | 35 | <p>1. Duke Molecular Physiology Institute, Duke University,.</p> <p>2. Department of Medicine, Duke University School of Medicine, Durham</p>                                                                                                                                                             |
| 19 | 2008 | Lindon JC     | 34 | <p>1. Biological Chemistry, Biomedical Sciences Division, Faculty of Medicine, Imperial College of Science, Technology and Medicine</p>                                                                                                                                                                   |

20

2016

SUMNER LW

33

1.Department of Biochemistry, University of Missouri.

2.Metabolomics and Bond Life Sciences Centers, University of Missouri.

---
